# Supplementary material
Source: PubMed Central journal article supplement (PMC8092910)
Supplement: AAC.02305-20-s000S1.pdf [file AAC.02305-20-s000S1.pdf]

Table S1. Parameters used for 10-fold cross-validation

| PPQ Susceptibility | Lambda | Family   |
|--------------------|--------|----------|
| PSA                | 0.6375 | Poisson  |
| IC50               | 0.5354 | Gaussian |
| IC90               | 1.2246 | Gaussian |
| AUC                | 3.0373 | Poisson  |

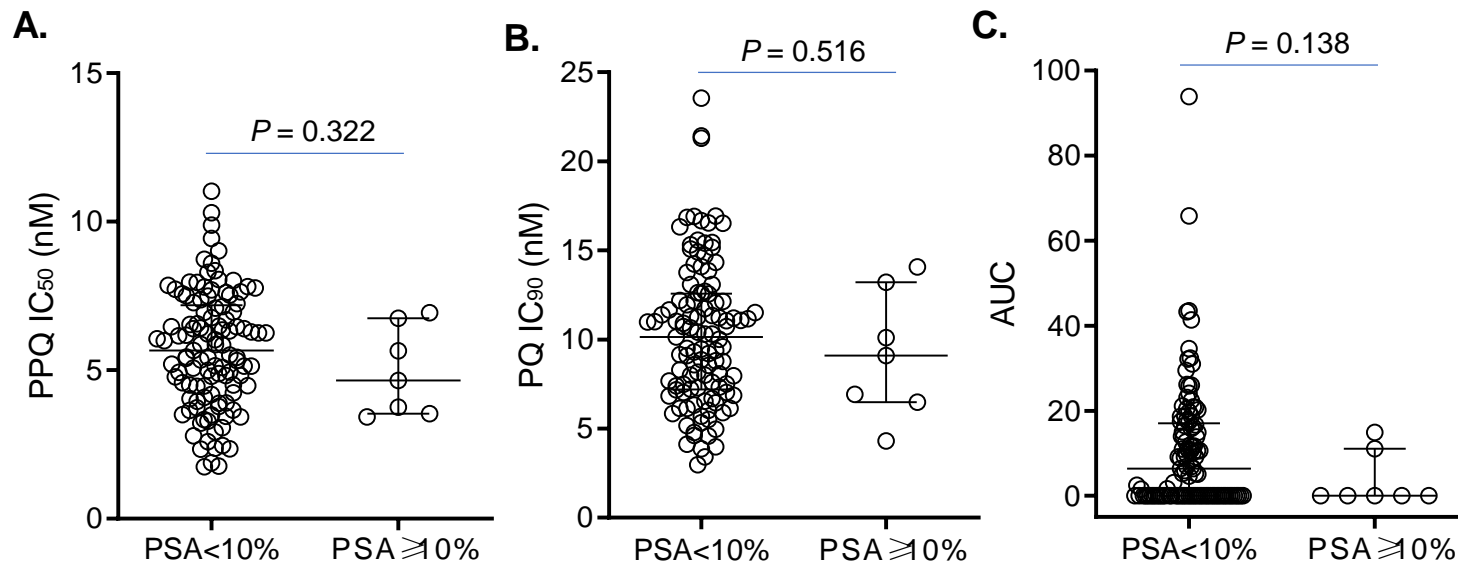

**Fig. S1.** Comparison of IC<sub>50</sub>, IC<sub>90</sub> and AUC values among parasite isolates with PSA values of <10% and  $\geq 10\%$ . Lines represent the median and interquartile range. *P* values were based on Mann-Whitney *U* test.

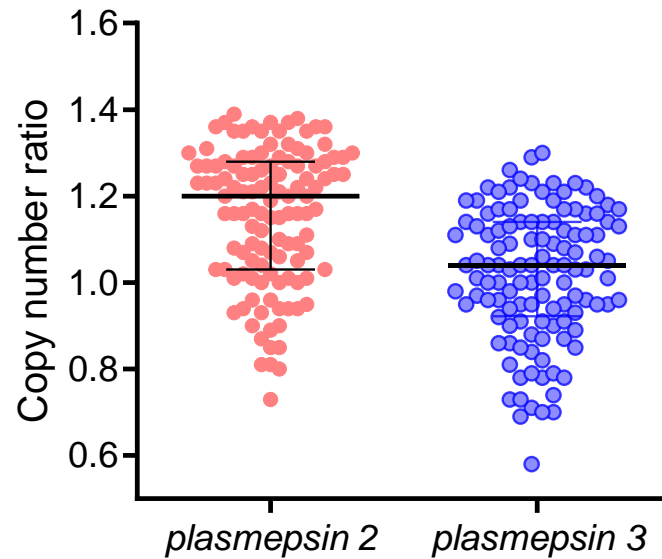

**Fig. S2.** Determination of *plasmepsin 2/3* amplification by real-time PCR. *Plasmepsin 2/3* copy number was calculated by the  $2^{-\Delta C_t}$  method using  $\beta$ -*tubulin* as the internal reference gene. 3D7 was included as a control. Copy number  $\geq 1.5$  was defined as an amplification of the gene.

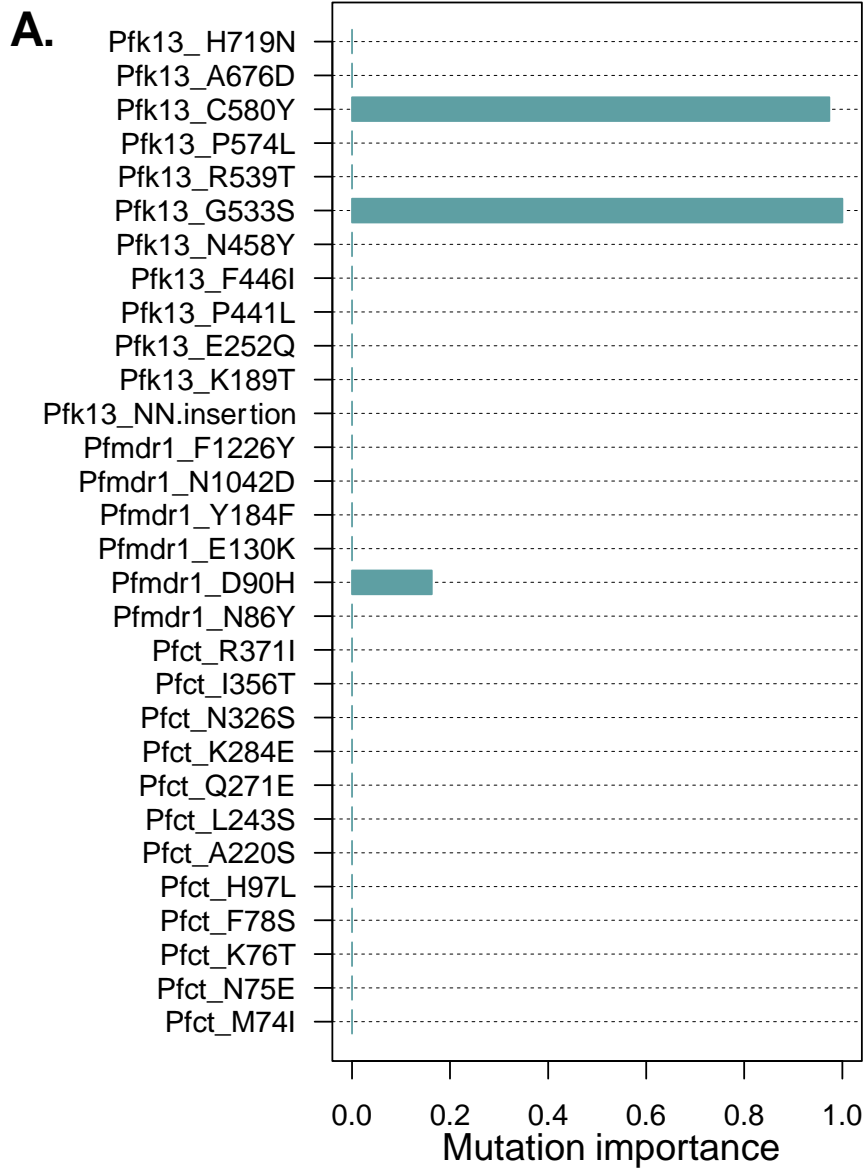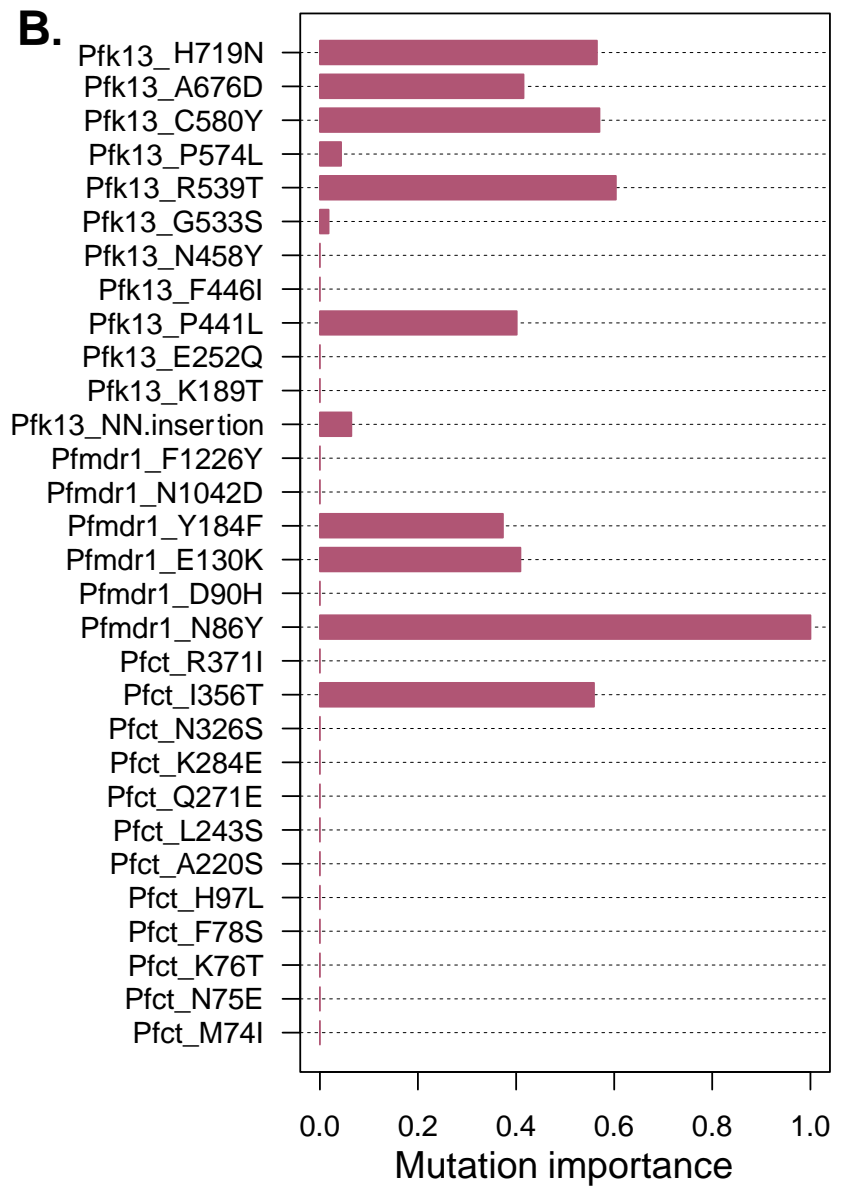

**Fig. S3.** The associations between mutation markers and the PPQ  $IC_{50}$  (A) and PSA (B) values. The absolute coefficient from Lasso regression is used to measure association intensity and normalized as the fraction of the highest absolute coefficient.

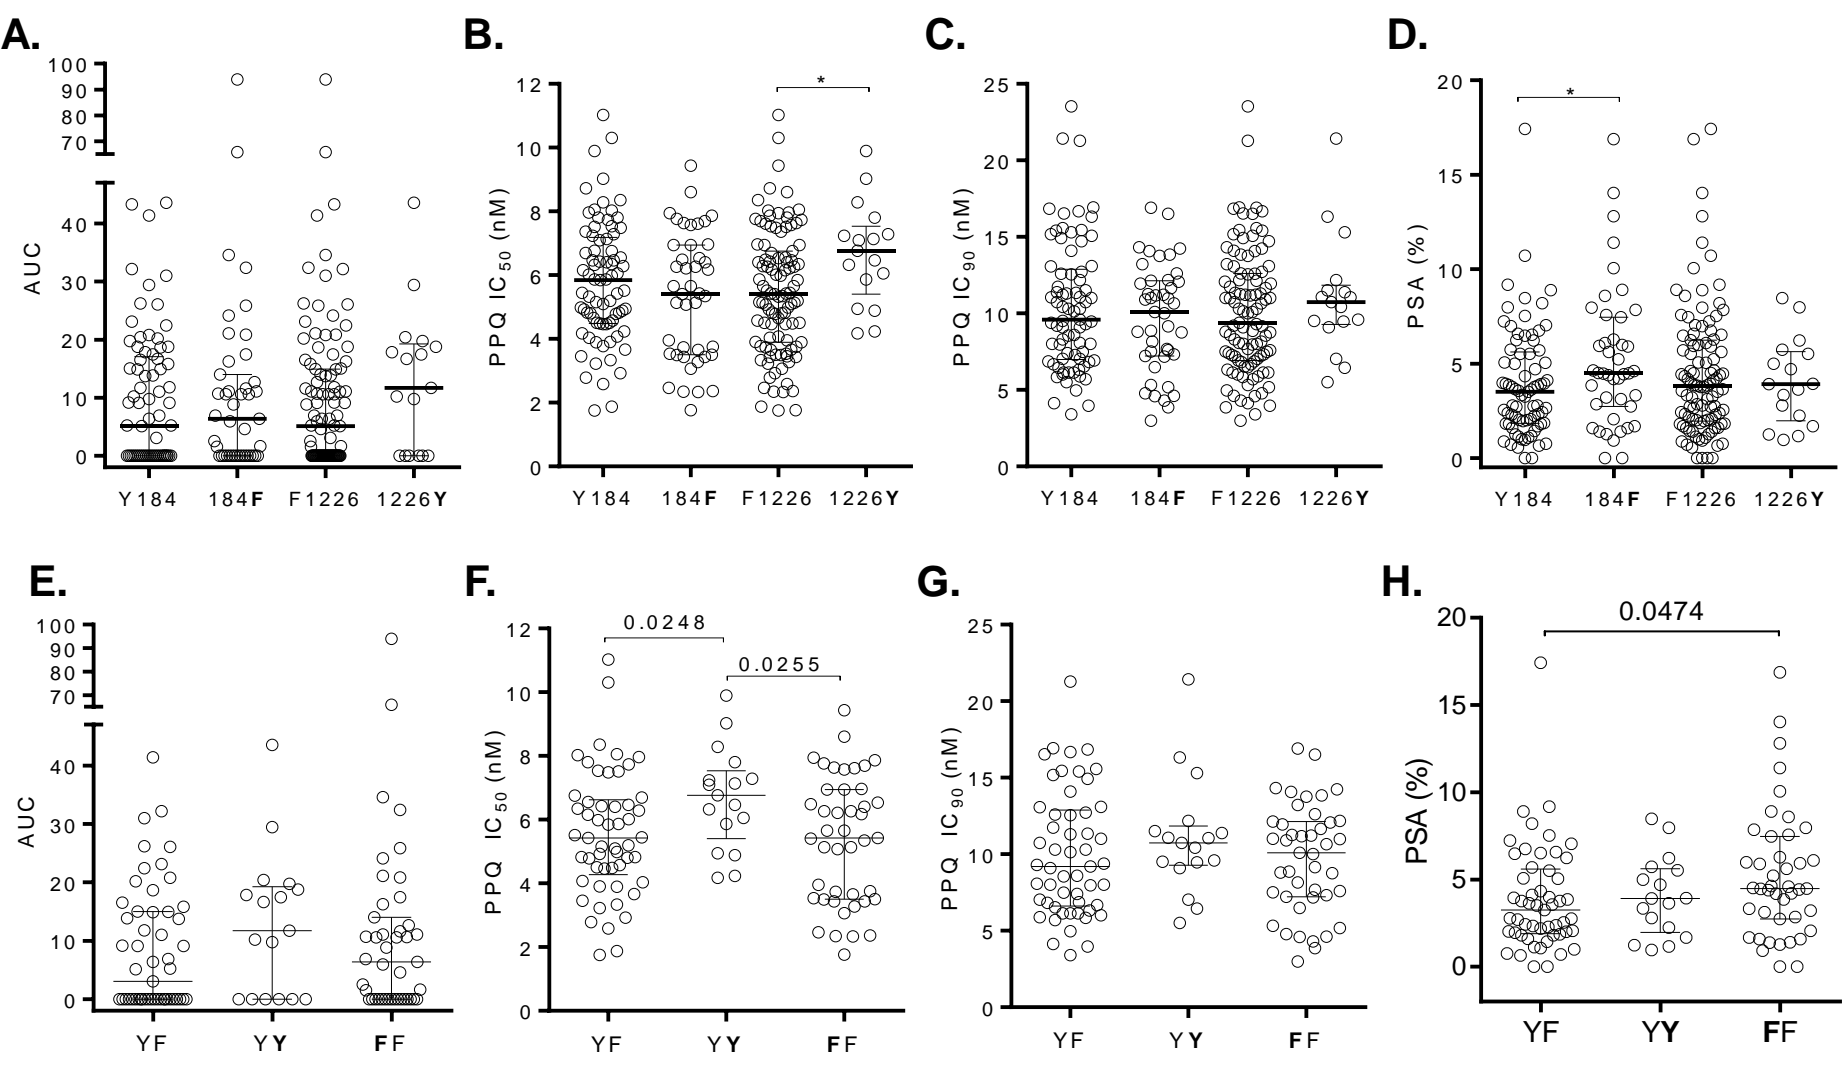

**Fig. S4.** Comparisons of in vitro piperazine susceptibility (AUC, IC<sub>50</sub>, IC<sub>90</sub> and PSA) between parasites with wild-type and pfmdr1 mutations (highlighted in bold). Upper panels show comparisons at individual amino acids, while lower panels show comparison among different haplotypes at 184 and 1226 positions (Y184/F1226, Y184/1226Y, and 184F/1226F). Only mutations or haplotypes exceeding 5% frequency were included in the analysis. AUC, area under curve. Horizontal lines indicate median ± interquartile range. Significant *P* values are indicated or marked with \* to indicate *P* < 0.05 (Mann-Whitney U test).

Table S2. Longitudinal prevalence of non-synonymous mutations and haplotypes of the *Pfmdr1* gene

|           |                        | Prevalence of isolates [n (%)] |                |                |                    |                |                     | Total<br>(n=120) | <i>P</i> value* |
|-----------|------------------------|--------------------------------|----------------|----------------|--------------------|----------------|---------------------|------------------|-----------------|
|           | Amino acid<br>position | 2007<br>(n=17)                 | 2008<br>(n=19) | 2009<br>(n=14) | 2010-2012<br>(n=7) | 2013<br>(n=36) | 2014-2016<br>(n=27) |                  |                 |
| SNP       | <b>N86Y</b>            | 0                              | 0              | 0              | 0                  | 1 (2.8)        | 1 (3.7)             | 2 (1.7)          | 0.86            |
|           | <b>D90H</b>            | 0                              | 0              | 0              | 0                  | 0              | 1 (3.7)             | 1 (0.8)          | 0.6274          |
|           | <b>E130K</b>           | 0                              | 0              | 0              | 0                  | 2 (5.6)        | 0                   | 2 (1.7)          | 0.4477          |
|           | <b>Y184F</b>           | 5 (29.4)                       | 5 (26.3)       | 4 (28.6)       | 0                  | 16 (44.4)      | 13 (48.1)           | 43 (35.8)        | 0.1442          |
|           | <b>N1042D</b>          | 0                              | 0              | 3 (21.4)       | 0                  | 0              | 0                   | 3 (2.5)          | 0.0003          |
|           | <b>F1226Y</b>          | 0                              | 0              | 0              | 0                  | 5 (13.9)       | 12 (44.4)           | 17 (14.2)        | <0.0001         |
| Haplotype | <b>WT</b>              | 12 (70.6)                      | 14 (73.7)      | 7 (50.0)       | 7 (100.0)          | 12 (33.3)      | 1 (3.7)             | 53 (44.2)        | <0.0001         |
|           | <b>YDEYNF</b>          | 0                              | 0              | 0              | 0                  | 1 (2.8)        | 0                   | 1 (0.8)          | 0.7985          |
|           | <b>NDKYNF</b>          | 0                              | 0              | 0              | 0                  | 2 (5.6)        | 0                   | 2 (1.7)          | 0.4477          |
|           | <b>NDEFNF</b>          | 5 (29.4)                       | 5 (26.3)       | 4 (28.6)       | 0                  | 16 (44.4)      | 13 (48.1)           | 43 (35.8)        | 0.1442          |
|           | <b>NDEYDF</b>          | 0                              | 0              | 3 (21.4)       | 0                  | 0              | 0                   | 3 (2.5)          | 0.0003          |
|           | <b>NDEYNY</b>          | 0                              | 0              | 0              | 0                  | 5 (13.9)       | 12 (44.4)           | 17 (14.2)        | <0.0001         |
|           | <b>YHEYNF</b>          | 0                              | 0              | 0              | 0                  | 0              | 1 (3.7)             | 1 (0.8)          | 0.6274          |

\* Chi-square test.
